# Supplementary material for: International Tables of Glycemic Index and Glycemic Load Values: 2008
Source: Oxford University Press journal article supplement (doi:10.2337/dc08-1239), 2008-10-04
Supplement: dc081239-sup-1239_referencesappendixtables.doc [file dc081239-sup-1239_referencesappendixtables.doc]

**Reference List for Online-Only Appendix Tables A1 and A2**

1. Brand-Miller J, Pang E, Broomhead L. The glycaemic index of foods containing sugars: comparison of foods with naturally-occurring v. added sugars. Br J Nutr 1995; 73: 613-23.
2. Trinidad TP, Valdez DH, Loyola AS, Mallillin AC, Askali FC, Castillo JC, Masa DB. Glycaemic index of different coconut (Cocos nucifera)-flour products in normal and diabetic subjects. Br J Nutr 2003; 90: 551-6.
3. Yang YX, Wang HW, Cui HM, Wang Y, Y LD, Xiang SX, Zhou SY. Glycemic index of cereals and tubers produced in China. World J Gastroenterol 2006; 12(21): 3430-3.
4. Quilez J, Bullo M, Salas-Salvado J. Improved postprandial response and feeling of satiety after consumption of low-calorie muffins with maltitol and high-amylose corn starch. J Food Sci 2007, 72: S407-S411.
5. Lako J, Sotheeswaran S, Aalbersberg W, Sreekumar KP. The glycemic index (GI) and glycemic load (GL) of five commonly consumed foods of the South Pacific. Pacific Health Dialog 2004, 11: 47 - 54.
6. Blair RM, Henley EC, Tabor A. Soy foods have low glycemic and insulin response indices in normal weight subjects. Nutr J 2006; 5: 35.
7. Liu S, Manson JE. Dietary carbohydrates, physical inactivity, obesity, and the 'metabolic syndrome' as predictors of coronary heart disease. Curr Opin Lipidol 2001; 12:395-404.
8. Brand-Miller JC, Allwan C, Mehalski K, Brooks D. The glycaemic index of further Australian foods. Proc Nutr Soc Aust 1998; 22: 110 (abstr).
9. Parcell AC, Drummond MJ, Christopherson ED, Hoyt GL, Cherry JA. Glycemic and insulinemic responses to protein supplements. J Am Diet Assoc 2004; 104: 1800-4.
10. Rizkalla SW, Laromiguiere M, Champ M, Bruzzo F, Boillot J, Slama G. Effect of baking process on postprandial metabolic consequences: randomized trials in normal and type 2 diabetic subjects. Euro J Clin Nutr 2007; 61: 175 - 183.
11. Liljeberg H, Granfeldt Y, Björk I. Metabolic responses to starch in bread containing intact kernels versus milled flour. Euro J Clin Nutr 1992; 46: 561-75.
12. Brown D, Tomlinson D, Brand-Miller J. The development of low glycaemic index breads. Proc Nutr Soc Aust 1992; 17:62 (abstr).
13. Brand Miller J, Bell L, Denning K, Browne D. In search of more low glycaemic index foods. Proc Nutr Soc Aust 1995; 19: 177 (abstr).
14. Aston LM, Gambell JM, Lee DM, Bryant SP, Jebb SA. Determination of the glycaemic index of various staple carbohydrate-rich foods in the UK diet. Euro J Clin Nutr 2007 (in press).
15. Liljeberg HG, Granfeldt YE, Björk IME. Products based on a high fiber barley genotype, but not on common barley or oats, lower postprandial glucose and insulin responses in healthy humans. J Nutr 1996; 126: 458-66.
16. Cavallero A, Empilli S, Brighenti F, Stanca AM. High (1-3, 1-4)- ß-glucan barley fractions in bread making and their effects on human glycemic response. J Cereal Sci 2002; 36: 59-66.
17. Åkerberg A, Liljeberg H, Björk I. Effects of amylose/amylopectin ratio and baking conditions on resistant starch formation and glycaemic indices. J Cereal Sci 1998; 28: 71-80.
18. Liljeberg HGM, Lönner CH, Björk IME. Sourdough fermentation or addition or organic acids or corresponding salts to bread improves nutritional properties of starch in healthy humans. J Nutr 1995; 125:1503-11.
19. Skrabanja V, Liljeberg-Elmståhl HGM, Kreft I, Björk IME. Nutritional properties of starch in buckwheat products: studies in vitro and in vivo. J Agric Food Chem 2001; 49: 490-6.
20. Johnson SK, Thomas SJ, Hall RS. Palatability and glucose, insulin and satiety responses of chickpea flour and extruded chickpea flour bread eaten as part of a breakfast. Euro J Clin Nutr 2005; 59: 169-76.
21. Dahl WJ, Lockert EA, Cammer AL, Whiting SJ. Effects of flax fiber on laxation and glycemic response in healthy volunteers. J Med Food 2005, 8: 208-11.
22. Brand Miller JC, Wang B, McNeil Y, Swan V. The glycaemic index of more breads, breakfast cereals and snack products. Proc Nutr Soc Aust 1997; 21: 144 (abstr).
23. Henry CJK, Lightowler HJ, Strik CM, Renton H, Hails S. Glycaemic index and glycaemic load values of commercially available products in the UK. Br J Nutr 2005; 94: 922-30.
24. Granfeldt Y, Björk I, Drews A, Tovar J. An in vitro procedure based on chewing to predict metabolic response to starch in cereal and legume products. Euro J Clin Nutr 1992; 46: 649-60.
25. Nehir El S. Determination of glycemic index for some breads. Food Chem 1999; 67: 67-9.
26. Juntunen KS, Niskanen LK, Liukkonen KH, Poutanen KS, Holst JJ, Mykkanen HM. Postprandial glucose, insulin, and incretin responses to grain products in healthy subjects. Am J Clin Nutr 2002; 75: 254-62.
27. Hätönen KA, Simila ME, Virtamo JR, Eriksson JG, Hannila M-L, Sinkko HK, Sundvall JE, Mykkanen HM, Valsta LM. Methodological considerations in the measurement of glycemic index: glycemic response to rye bread, oatmeal porridge, and mashed potato. Am J Clin Nutr 2006; 84: 1055-61.
28. Brand JC, Foster KAF, Crossman S, Truswell AS. The glycaemic and insulin indices of realistic meals and rye breads tested in healthy subjects. Diab Nutr Metab 1990; 3: 137-42.
29. Perry T, Mann J, Mehalski K, Gayya C, Wilson J, Thompson C. Glycaemic index of New Zealand foods. NZ Med J 2000; 3:137-42.
30. Marques C, D'auria L, Cani PD, Baccelli C, Rozenberg R, Ruibal-Mendieta NL, Petitjean G, Delacroix DL, Quetin-Leclercq J, Habib-Jiwan J-L, Meurens M, Delzenne N. Comparison of glycemic index of spelt and wheat bread in human volunteers. Food Chem 2007; 100: 1265-71.
31. Skrabanja V, Kova B, Golob T, Liljeberg Elmståhl HGM, Björk IME, Kreft I. Effect of spelt wheat flour and kernel on bread composition and nutritional characteristics. J Agric Food Chem 2001; 49: 497-500.
32. Henry CJK, Lightowler HJ, Dodwell LM, Wynne M. Glycaemic index and glycaemic load values of cereal products and weight-management meals available in the UK. Br J Nutr 2007; 98: 147-53.
33. Jenkins DJA, Wolever TMS, Taylor RH, Barker H, Fielden H, Baldwin JM, Bowling AC, Newman HC, Jenkins AL, Goff DV. Glycemic index of foods: a physiological basis for carbohydrate exchange. Am J Clin Nutr 1981; 34: 362-6.
34. Wolever TMS, Vorster HH, Björk I, Brand-Miller J, Brighenti F, Mann JI, Ramdath DD, Granfeldt Y, Holt S, Perry TL, Venter C, Wu X. Determination of the glycaemic index of foods: Interlaboratory study. Euro J Clin Nutr 2003; 57: 475-82.
35. Vega-Lopez S, Ausmann LM, Griffith JL, Lichtenstein AH. Interindividual variability and intra-individual reproducibility of glycemic index values for commercial white bread. Diab Care 2007; 30: 1412-17.
36. Walker ARP, Walker BF. Glycaemic index of South African foods determined in rural blacks - a population at low risk of diabetes. Hum Nutr Clin Nutr 1984; 38C: 215-22.
37. De Angelis M, Rizzello CG, Alfonsi G, Arnault P, Cappelle S, Di Cagno R, Gobbetti M. Use of sourdough lactobacilli and oat fibre to decrease the glycaemic index of white wheat bread. Br J Nutr 2007, 98: 1196-1205.
38. Sugiyama M, Tang AC, Wakaki Y, Koyama W. Glycemic index of single and mixed meal foods among common Japanese foods with white rice as a reference food. Euro J Clin Nutr 2003; 57: 743-52.
39. Chlup R, Jelenova D, Kudlova P, Chlupova K, Bartek J, Zapletalova J, Langova K, Chlupova L. Continuous glucose monitoring - A novel approach to the determination of the glycaemic index of foods (DEGIF 1). Exp Clin Endocrinol Diabetes 2006; 114: 68-74.
40. Burton P, Lightowler HJ. The impact of freezing and toasting on the glycaemic response of white bread. Euro J Clin Nutr 2007 (in press).
41. Henry CJK, Lightowler HJ, Kendall FL, Storey M. The impact of the addition of toppings/fillings on the glycaemic response to commonly consumed carbohydrate foods. Eur J Clin Nutr 2006; 60: 763-9.
42. Frati Munari AC, Benitez Pinto W, Ariza CR, Casarrubias M. Lowering glycemic index of food by acarbose and Plantago psyllium mucilage. Arch Med Res 1998; 29(2): 137-41.
43. Johnson SK, McQuillan PL, Sin JH, Ball MJ. Sensory acceptability of white bread with added Australian sweet lupin (Lupinus angustifolius) kernel fibre and its glycaemic and insulinaemic responses when eaten as a breakfast. J Sci Food Agric 2003; 83: 1366-72.
44. Lu ZX, Walker KZ, Muir JG, Mascara T, O'Dea K. Arabinoxylan fiber, a byproduct of wheat flour processing, reduces the postprandial glucose response in normoglycemic subjects. Am J Clin Nutr 2000; 71(5): 1123-8.
45. Trinidad T, Perez E, Loyola A, Mallillin A, Encabo R, Yokawa T, Aoyama N, Juneja L. Glycemic index of Sunfibre (*Cyamoposis teragonolobus*) products in normal and diabetic subjects. Int J Food Sci Tech 2004; 39:1093-8.
46. Hoebler C, Karinthi A, Chiron H, Champ M, Barry J-L. Bioavailability of starch in bread rich in amylose: metabolic responses in healthy subjects and starch structure. Euro J Clin Nutr 1999; 53: 360-6.
47. Goñi I, Valdivieso L, Garcia-Alonso A. Nori seaweed consumption modifies glycemic response in healthy volunteers. Nutr Res 2000; 20(10): 1367-75.
48. Liljeberg H, Björk I. Delayed gastric emptying rate may explain improved glycaemia in healthy subjects to a starchy meal with added vinegar. Euro J Clin Nutr 1998; 52: 368-71.
49. Ostman E, Granfeldt Y, Persson L, Björk I. Vinegar supplementation lowers glucose and insulin responses and increases satiety after a bread meal in healthy subjects. Euro J Clin Nutr 2005, 59: 983-8.
50. Burton P, Lightowler HJ. Influence of bread volume on glycaemic response and satiety. Br J Nutr 2006; 96: 877-82.
51. Fitz-Henry A. In vitro and in vivo rates of carbohydrates digestion in Aboriginal bushfoods and contemporary Western Foods. BSc thesis (Honours). Human Nutrition Unit, University of Sydney, Australia, 1982.
52. Ross SW, Brand JC, Thorburn AW, Truswell AS. Glycemic index of processed wheat products. Am J Clin Nutr 1987; 46: 631-5.
53. Bakhoj S, Flint A, Holst JJ, Tetens I. Lower glucose-dependent insulinotropic polypeptide (GIP) response but similar glucagon-like peptide 1 (GLP-1), glycaemic, and insulinaemic response to ancient wheat compared to modern wheat depends on processing. Euro J Clin Nutr 2003; 57: 1254-61.
54. Holt S, Brand J, Soveny C, Hansky J. Relationship of satiety to postprandial glycaemic, insulin and cholecystokinin responses. Appetite 1992; 18: 129-41.
55. Potter JG, Coffman KP, Reid RL, Krall JM, Albrink MJ. Effect of test meals of varying dietary fiber content on plasma insulin and glucose response. Am J Clin Nutr 1981; 34: 328-34.
56. Schenk S, Davidson CJ, Zderic TW, Byerley LO, Coyle EF. Different glycemic indexes of breakfast cereals are not due to glucose entry into blood but to glucose removal by tissue. Am J Clin Nutr 2003, 78: 742-8.
57. Granfeldt Y, Liljeberg H, Drews A, Newman R, Björk I. Glucose and insulin responses to barley products: influence of food structure and amylose-amylopectin ratio. Am J Clin Nutr 1994; 59(5): 1075-82.
58. Granfeldt Y, Eliasson A, Björck I. An examination of the possibility of lowering the glycemic index of oat and barley flakes by minimal processing. J Nutr 2000; 130: 2207-14.
59. Englyst KN, Vinoy S, Englyst HN, Lang V. Glycaemic index of cereal products explained by their content of rapidly and slowly available glucose. Br J Nutr 2003; 89: 329-39.
60. Brand JC, Nicholson PL, Thorburn AW, Truswell AS. Food processing and the glycemic index. Am J Clin Nutr 1985; 42: 1192-6.
61. Mäkeläinen H, Anttila H, Sihvonen J, Hietanen R-M, Tahvonen R, Salminen E, Mikola M, Sontag-Strohm T. The effect of ß-glucan on the glycemic and insulin index. Euro J Clin Nutr 2007; 61(6): 779-85.
62. Brand-Miller J, Pang E, Bramall L. Rice: a high or low glycemic index food ? Am J Clin Nutr 1992; 56: 1034-6.
63. Granfeldt Y, Wu X, Björk I. Determination of glycaemic index; some methodological aspects related to the analysis of carbohydrate load and characteristics of the previous evening meal. Euro J Clin Nutr 2006; 60: 104-12.
64. Shukla K, Narain JP, Puri P, Gupta A, Bijlani RL, Mahapatra SC, Karmarkar MG. Glycaemic response to maize, bajra and barley. Indian J Physiol Pharmacol 1991: 35: 249-54.
65. Crapo PA, Reaven G, Olefsky J. Postprandial plasma-glucose and -insulin responses to different complex carbohydrates. Diabetes 1977; 26(12): 1178-83.
66. Dilawari JB, Kamath PS, Batta RP, Mukewar S, Raghavan S. Reduction of postprandial plasma glucose by Bengal gram dhal (*Cicer arietinum*) and Rajmah (*Phaseolus vulgaris*). Am J Clin Nutr 1981; 34: 2450-3.
67. Kanan W, Biljani RL, Sachdeva U, Mahapatra SC, Shah P, Karmarkar MG. Glycaemic and insulinaemic responses to natural foods, frozen foods and their laboratory equivalents. Indian J Physiol Pharmacol 1998; 42 (1): 81-9.
68. Gatti E, Testolin G, Noè D, Brighenti F, Buzzetti GP, Porrino M, Sirtori CR. Plasma glucose and insulin responses to carbohydrate food (rice) with different thermal processing. Ann Nutr Metab 1987; 331: 296-303.
69. Holt SHA, Brand-Miller J. Increased Insulin Responses to Ingested Foods are Associated with Lessened Satiety. Appetite 1995; 24: 43-54.
70. Ito Y, Mizukuchi A, Kise M, Aoto H, Yamamoto S, Yoshihara R, Yokoyama J. Postprandial blood glucose and insulin responses to pre-germinated brown rice in healthy subjects. J Med Invest 2005; 52: 159-64.
71. Matsuo T, Mizushima Y, Komuro M, Sugeta A, Suzuki M. Estimation of glycemic and insulinemic responses to short-grain rice (Japonica) and a short-grain rice- mixed meal in healthy young subjects. Asia Pacific J Clin Nutr 1999; 8(3): 190-4.
72. Panlasigui LN, Thompson LU. Blood glucose lowering effects of brown rice in normal and diabetic subjects. Int J Food Sci Nutr 2006; 57: 151-8.
73. Panlasigui LN, Thompson LU, Juliano BO, Perez CM, Jenkins DJA, Yiu SH. Extruded rice noodles: starch digestibility and glycemic response of healthy and diabetic subjects with different habitual diets. Nutr Res 1992; 12: 1195-204.
74. Panlasigui LN, Thompson LU, Juliano BO, Perez CM, Yiu SH, Greenberg GR. Rice varieties with similar amylose content differ in starch digestibility and glycemic response in humans. Am J Clin Nutr 1991, 54: 871-7.
75. Kurup PG, Krishnamurthy S. Glycemic Index of Selected Foodstuffs commonly used in South India. Int J Vit Nutr Res 1992; 62: 266-8.
76. Bucalossi A, Conti A, Lombardo S, Marsilii A, Petruzzi E, Piazza E, Pulini M. Glycaemic and insulinaemic responses to different carbohydrates in Type II (NIDD) diabetic patients. Diab Nutr Metab 1990; 3: 143-51.
77. Chan HMS, Brand-Miller JC, Holt SHA, Wilson D, Rozman M, Petocz P. The glycaemic index values of Vietnamese foods. Euro J Clin Nutr 2001; 55: 1076-83.
78. Östman EM, Liljeberg Elmståhl HGM, Björk IME. Inconsistency between glycemic and insulinemic responses to regular and fermented milk products. Am J Clin Nutr 2001; 74: 96-100.
79. Hoyt G, Hickey MS, Cordain L. Dissociation of the glycaemic and insulinaemic responses to whole and skimmed milk. Br J Nutr 2005; 93: 175-7.
80. Nilsson M, Stenberg M, Frid AH, Holst JJ, Björk IME. Glycaemia and insulinaemia in healthy subjects after lactose-equivalent meals of milk and other food proteins: the role of plasma amino acids and incretins. Am J Clin Nutr 2004, 80: 1246-53.
81. Bahado-Singh PS, Wheatley AO, Ahmad MH, Morrison EY, Asemota HN. Food processing methods influence the glycaemic indices of some commonly eaten West Indian carbohydrate-rich foods. Br J Nutr 2006; 96: 476-81.
82. Thorburn A. Digestion and absorption of carbohydrate in Australian Aboriginal, Pacific Island and Western Foods. PhD thesis. Human Nutrition Unit, University of Sydney, Australia, 1986.
83. Miller CJ, Dunn EV, Hashim IB. Glycemic index of 3 varieties of dates. Saudi Med J 2002; 23: 536-8.
84. Miller CJ, Dunn EV, Hashim IB. The glycaemic index of dates and date/yoghurt mixed meals. Are dates 'the candy that grows on trees'? Euro J Clin Nutr 2003; 57: 427-30.
85. Nilsson M, Elmståhl H, Björk I. Glucose and insulin responses to porridge and gruel meals intended for infants. Euro J Clin Nutr 2005; 59: 646-50.
86. Traianedes K, O'Dea K. Commercial canning increases the digestibility of beans in vitro and postprandial metabolic responses to them in vivo. Am J Clin Nutr 1986; 44: 390-7.
87. Akanji AO, Charles-Davies MA, Ezenwaka C, Abbiyesuku FA, Osotimehin BO. Dietary salt and the glycaemic response to meals of different fibre content. Euro J Clin Nutr 1989; 43: 699-703.
88. Panlasigui LN, Panlilio LM, Madrid JC. Glycaemic response in normal subjects to five different legumes commonly used in the Philippines. Int J Food Sci and Nutr 1995; 46: 155-60.
89. Wolever TMS, Nuttall FQ, Lee R, Wong GS, Josse RG, Csima A, Jenkins DJA. Prediction of the relative blood glucose response of mixed meals using the white bead glycemic index. Diab Care 1985; 8(5): 418-28.
90. Chew I, Brand JC, Thorburn AW, Truswell AS. Application of glycemic index to mixed meals. Am J Clin Nutr 1988; 47: 53-6.
91. Jenkins DJA, Kendall CWC, Josse AR, Salvatore S, Brighenti F, Augustin LSA, Ellis PR, Vidgen E, Venket Rao A. Almonds decrease postprandial glycemia, insulinemia and oxidative damage in healthy individuals. J Nutr 2006; 136(12): 2987-92.
92. Araya H, Pak N, Vera G, Alviña M. Digestion rate of legume carbohydrates and glycemic index of legume-based meals. Int J Food Sci and Nutr 2003; 54: 119-26.
93. Gatti E, Noè D, Pazzucconi F, Gianfranceschi G, Porrini M, Testolin G, Sirtori CR. Differential effect of unsaturated oils and butter on blood glucose and insulin response to carbohydrate in normal volunteers. Euro J Clin Nutr 1992; 46: 161-6.
94. Edes TE, Shah JH. Glycemic index and insulin response to a liquid nutritional formula compared with a standard meal. Am J Coll Nutr 1998; 17(1): 30-5.
95. Josse AR, Kendall CWC, Augustin LSA, Ellis PR, Jenkins DJA. Almonds and postprandial glycemia - a dose response study. Metabolism: Clinical and Experimental 2007; 56: 400-4.
96. Hofman Z, van Drunen JDE, Kuipers H. The Glycemic Index of standard and diabetes-specific enteral formulas. Asia Pac J Clin Nutr 2006; 15(3): 412-7.
97. Visek J, Zourek M, Lacigova S, Rusavy Z. Influence of fiber on glycemic index of enteral nutrition. J Parenter Enteral Nutr 2007, 31: 491-5.
98. Foster KA. Glucose and insulin response to legumes, pastas and rye breads. BSc thesis (Honours). Human Nutrition Unit, Department of Biochemistry, University of Sydney, Australia, 1987.
99. Packer SC, Dornhorstt A, Frost GS. The glycaemic index of a range of gluten-free foods. Diabet Med 2000; 17: 657-60.
100. Granfeldt Y, Björk I, Hagander B. On the importance of processing conditions, product thickness and egg addition for the glycaemic and hormonal responses to pasta: a comparison with bread made from 'pasta ingredients'. Euro J Clin Nutr 1991; 45: 489-99.
101. Goñi I, Valentín-Gamazo C. Chickpea flour ingredient slows glycemic response to pasta in healthy volunteers. Food Chem 2003; 81: 511-5.
102. Mourot J, Thouvenot P, Antoine JM, Debry G. Glycaemic and insulinaemic indices of four starchy foods. In: Leff S, ed. Advances in diet and nutrition. 2nd ed. London: John Libbey & Co, 1988.
103. Bornet FRJ, Cloarec D, Barry JL, Colonna P, Gouilloud S, Laval JD, Galmiche JP. Pasta cooking time: influence on starch digestion and plasma glucose and insulin responses in healthy subjects. Am J Clin Nutr 1990; 51: 421-7.
104. Pelletier X, Hanesse B, Bornet F, Debry G. Glycaemic and insulinaemic responses in healthy volunteers upon ingestion of maltitol and hydrogenated glucose syrups. Diabete & Metabolisme (Paris) 1994; 20: 291-6.
105. Riestra A, Cubas G, Amado JA. Effect of the Ingestion of nougat on glycemia and insulinemia in healthy volunteers. Nutr Hosp 1995; 6: 354-7.
106. Wolever TMS, Vuksan V, Palmason C. Less variation of postprandial blood glucose after starchy test meals than oral glucose. Nutr Res 1996; 16(6): 899 - 905.
107. Miller CK, Gabbay RA, Dillon J, Apgar J, Miller D. The effect of three snack bars on glycemic response in healthy adults. J Am Diet Assoc 2006; 106: 745-8.
108. Hertzler S. Glycemic index of "energy" snack bars in normal volunteers. J Am Diet Assoc 2000; 100: 97-100.
109. Lee BM, Wolever TMS. Effect of glucose, sucrose and fructose on plasma glucose and insulin responses in normal humans: comparison with white bread. Euro J Clin Nutr 1998; 52: 924-8.
110. Vuksan V, Sievenpiper JL, Koo VYY, et al. American ginseng (*Panax quinqefolius* *L.*) reduces postprandial glycemia in nondiabetic subjects and subjects with type 2 diabetes. Arch Intern Med 2000; 160: 1009-13.
111. Braaten JT, Wood PJ, Scott FW, Riedel KD, Poste LM, Collins MW. Oat gum lowers glucose and insulin after an oral glucose load. Am J Clin Nutr 1991; 53: 1425-30.
112. Sharma RD. Hypoglycemic effect of gum acacia in healthy human subjects. Nutr Res 1985; 5: 1437-41.
113. Ischayek JI, Kern M. US honeys varying in glucose and fructose content elicit similar glycemic indexes. J Am Diet Assoc 2006; 106: 1260-2.
114. Matsuo T. Estimation of glycemic response to maltitol and mixture of maltitol and sucrose in healthy young subjects. Tech Bull Fac Agr Kagawa Univ 2003; 55: 57-61.
115. Ramdath DD, Isaacs RLC, Teelucksingh S, Wolever TMS. Glycaemic index of selected staples commonly eaten in the Caribbean and the effects of boiling v. crushing. Br J Nutr 2004; 91: 971-7.
116. Soh NL, Brand-Miller J. The glycaemic index of potatoes: the effect of variety, cooking method and maturity. Euro J Clin Nutr 1999, 53: 249-54.
117. Leeman M, Ostman E, Björk I. Glycaemic and satiating properties of potato products. Euro J Clin Nutr 2007 (in press).
118. Henry CJK, Lightowler HJ, Strik CM, Storey M. Glycaemic index values for commercially available potatoes in Great Britain. Br J Nutr 2005; 94: 917-21.
119. Leeman M, Östman E, Björk I. Vinegar dressing and cold storage of potatoes lowers postprandial glycaemic and insulinaemic responses in health subjects. Euro J Clin Nutr 2005; 59 :1266-71.
120. Fernandes G, Velangi A, Wolever TMS. Glycemic index of potatoes commonly consumed in North America. J Am Diet Assoc 2005; 105: 557-62.
121. MacIntosh CG, Holt SHA, Brand-Miller JC. The degree of fat saturation does not alter glycemic, insulinemic or satiety responses to a starchy staple in healthy men. J Nutr 2003; 133(8): 2577-80.
122. Mbanya J-CN, Mfopou JK, Sobngwi E, Mbanya DNS, Ngogang JY. Metabolic and hormonal effects of five common African diets eaten as mixed meals: the Cameroon Study. Euro J Clin Nutr 2003; 57: 580-5.
123. Brakohiapa LA, Quaye IKE, Amoah AGB, Harrison EK, Kennedy DO, Kido Y, Ofei F. Blood glucose responses to mixed Ghanaian diets in healthy adult males. West Afr J Med 1997; 16(3):170-3.
124. Mehio Z, Hwalla Baba N, Habbal Z. Glycemic and insulinemic responses of normal subjects to selected meals commonly consumed in the Middle East. J Nutr Environ Med 1997; 7: 275-86.
125. Sumathi A, Vishwanatha S, Malleshi NG, Venkat Rao S. Glycemic response to malted, popped and roller dried wheat-legume based foods in normal subjects. Int J Food Sci Nutr 1997; 48: 103-7.
126. Urooj A, Puttaraj S. Glycaemic responses to cereal-based Indian food preparations in patients with non-insulin-dependent diabetes mellitus and normal subjects. Br J Nutr 2000; 83: 483-8.
127. Batra M, Sharma S, Seth V. The glycaemic index of fermented and non-fermented legum-based snack food. Asia Pacific J Clin Nutr 1994; 3: 151-4.
128. Shobana S, Usha Kumari SR, Malleshi NG, Ali SZ. Glycemic response of rice, wheat and finger millet based diabetic food formulations in normoglycemic subjects. Int J Food Sci Nutr 2007, 58: 363-372.
129. Brand JC, Snow BJ, Nabhan GP, Truswell AS. Plasma glucose and insulin responses to traditional Pima Indian meals. Am J Clin Nutr 1990, 51: 416-20.
130. Payne Y. The glycaemic index of six foods traditionally consumed by the Pima Indian tribe. Masters of nutrition and dietetics research essays. Vol 3, section 12. Human Nutrition Unit, University of Sydney, Australia, 1992.
131. Semprun-Fereira M, Ryder E, Morales LM, Gomez ME, Raleigh X. Glycemic index and insulin response to the ingestion of precooked corn flour in the form of "arepa" in healthy individuals. Invest Clin 1994; 35(3): 131-42.
132. Granfeldt Y, Drews A, Björk I. Arepas made from high amylose corn flour produce favourably low glucose and insulin response in healthy humans. J Nutr 1995; 125: 459-65.
133. Schnell M, Pacheco de Delahaye E, Mezones Y. Metabolic Responses to Venezuelan corn meal and rice bran supplemented Arepas (breads). Cereal Chem 2005; 82(1): 77-80.
134. Noriega E, Rivera L, Peralta E. Glycaemic and insulinaemic indices of Mexican foods high in complex carbohydrates. Diab Nutr Metab 2000; 13: 13-9.
135. Araya H, Contreras P, Alviña M, Vera G, Pak N, A comparison between an in vitro method to determine carbohydrate digestion rate and the glycemic response in young men. Euro J Clin Nutr 2002; 56, 735-9.
136. Cordenunsi BR, Wenzel de Menezes E, Genovese MI, Colli C, Goncalves de Souza A, Lajolo FM. Chemical composition and glycemic index of Brazilian Pine (*Araucaria angustifolia*) Seeds. J Agric Food Chem 2004; 52: 3412-6.
137. Wolever TMS, Katzman-Relle L, Jenkins AL, Vuksan V, Josse RG, Jenkins DJA. Glycaemic index of 102 complex carbohydrate foods in patients with diabetes. Nutr Res 1994; 14(5): 651-69.
138. Krezowski PA, Nuttal FQ, Gannon MC, et al. Insulin and glucose responses to various starch-containing foods in type II diabetic subjects. Diab Care 1987; 10: 205-12.
139. Gretebeck RJ, Gretebeck KA, Tittelbach TJ. Glycemic index of popular sports drinks and energy foods. J Am Diet Assoc 2002; 102(3): 415-7.
140. Bornet FRJ, Costagliola D, Rizkalla SW, Blayo A, Fontvieille A-M, Haardt M-J, Letanoux M, Tchobroutsky G, Slama G. Insulinemic and glycemic indexes of six starch-rich foods taken alone and in a mixed meal by type 2 diabetics. Am J Clin Nutr 1987; 45: 588-95.
141. Jenkins DJA, Wesson V, Wolever TMS, Jenkins AL, Kalmusky J, Guidici S, Csima A, Josse RG, Wong GS. Wholemeal versus wholegrain breads: proportion of whole or cracked grains and the glycaemic response. Br Med J (Clin Res Ed) 1988; 297: 958-60.
142. Otto H, Niklas. Differences d'action sur la glycemie d'aliments contenant des hydrated de carbone: consequences pour le traitment dietetique du diabete sucre. (Differences in the action of foods containing carbohydrate on blood glucose levels: implications for the dietetic treatment of diabetes mellitus.) Cited by: Jenkins DJA, Wolever TMS, Jenkins AL. Starchy foods and glycemic index. Diab Care 1988; 11: 149-59.
143. Rasmussen O, Winther E, Hermansen K. Glycaemic responses to different types of bread in insulin-dependant diabetic subjects (IDDM): Studies at constant insulinaemia. Euro J Clin Nutr 1991; 45: 97 - 103.
144. Jenkins DJA, Wolever TMS, Jenkins AL, Giordano C, Giudici S, Thompson LU, Kalmusky J, Josse RG, Wong GS. Low glycemic response to traditionally processed wheat and rye products: bulgur and pumpernickel bread. Am J Clin Nutr 1986; 43: 516-20.
145. Wolever TMS, Jenkins DJA, Josse RG, Wong GS, Lee R. The glycemic index: similarity of values derived in insulin-dependent and non-insulin dependent diabetic patients. J Am Coll Nutr 1987; 6: 295-305.
146. Jenkins DJA, Wolever TMS, Kalmusky J, Giudici S, Giordano C, Wong GS, Bird JN, Pattern R, Hall M, Buckley G, Little JA. Low glycemic index carbohydrate foods in the management of hyperlipidemia. Am J Clin Nutr 1985; 42(4): 604-17.
147. Schauberger G, Brinck UC, Guldner G, Spaethe R, Niklas L, Otto H. Exchange of carbohydrates according to their effect on blood glucose. Diabetes 1978; 26: 415 (abstr).
148. Crapo PA, Kolterman OG, Waldeck N, Reaven GM, Olefsky JM. Postprandial hormonal responses to different types of complex carbohydrate in individuals with impaired glucose tolerance. Am J Clin Nutr 1980; 33: 1723-8.
149. Jenkins DJA, Wolever TMS, Jenkins AL, Thorne MJ, Lee R, Kalmusky J, Reichert R, Wong GS. The glycaemic index of foods tested in diabetic patients: a new basis for carbohydrate exchange favouring the use of legumes. Diabetologia 1983; 24: 257-64.
150. Lock DR, Bar-Eyal A, Voet H, Madar Z. Glycemic indices of various foods given to pregnant diabetic subjects. Obstet Gynecol 1988; 71: 180-2.
151. Giacco R, Brighenti F, Parillo M, Capuano M, Ciardullo AV, Rivieccio A, Rivellese AA, Riccardi G. Characteristics of some wheat-based foods of the Italian diet in relation to their influence on postprandial glucose metabolism in type 2 diabetic patients. Br J Nutr 2001; 85: 33-40.
152. Donduran S, Hamulu F, Çentinkalp S, Çolak B, Horozoglu N, Tüzün M. Glycaemic index of different kinds of carbohydrates in type 2 diabetes. Eating Weight Disord 1999; 4: 203-6.
153. Golay A, Schneider H, Temler E, Felber JP. Effect of trestatin, an amylase inhibitor, incorporated into bread, on glycemic responses in normal and diabetic patients. Am J Clin Nutr 1991; 53: 61-5.
154. Jenkins DJA, Wolever TMS, Jenkins AL, Lee R, Wong GS, Josse R. Glycemic response to wheat products: Reduced response to pasta but no effect of fiber. Diab Care 1983; 6(2): 155-9.
155. Jenkins DJA, Wolever TMS, Wong GS, Kenshole A, Josse RG, Thompson LU, Lam KY. Glycemic responses to foods: possible differences between insulin-dependent and non-insulin dependent diabetics. Am J Clin Nutr 1984; 40: 971-81.
156. Ayuo PO, Ettyang GA. Glycaemic Responses After Ingestion of Some Local Foods by non-insulin dependent diabetic subjects. East Afr Med J 1996; 73(12): 782-5.
157. d'Emden MC, Marwick TH, Dreghorn J, Howlett VL, Cameron DP. Post-prandial glucose and insulin responses to different types of spaghetti and bread. Diabetes Res Clin Prac 1987; 3: 221-6.
158. Chaturvedi A, Sarojini G, Nirmala G, Nirmalamma N, Satyanarayana D. Glycemic index of grain amaranth, wheat and rice in NIDDM subjects. J Plant Foods Hum Nutr 1997; 50: 171-8.
159. Jenkins AL, Jenkins DJA, Zdravkovic U, Würsch P, Vuksan V. Depression of the glycemic index by high levels of ß-glucan fiber in two functional foods tested in type 2 diabetes. Euro J Clin Nutr 2002; 56: 622-8.
160. Tapola N, Karvonen H, Niskanen L, Mikola M, Sarkkinen E. Glycemic responses of oat bran products in type 2 diabetic patients. Nutr Metab Cardiovasc Dis 2005; 15: 255-61.
161. Wolever TMS, Wong GS, Kenshole A, Josse RG, Thompson LU, Lam KY, Jenkins DJA. Lactose in the diabetic diet: A comparison with other carbohydrates. Nutr Res 1985; 5: 1335-45.
162. Chlup R, Bartek J, Reznickova M, Zapletalova J, Doubravova B, Chlupova L, Seckar P, Dvorackova S, Simanek V. Determination of the glycaemic index of selected foods (white bread and cereal bars) in healthy persons. Biomed Papers 2004; 148(1): 17-25.
163. Crapo PA, Insel J, Sperling M, Kolterman OG. Comparison of serum glucose, insulin, and glucagon responses to different types of complex carbohydrate in noninsulin-dependent diabetic patients. Am J Clin Nutr 1981; 34: 184-90.
164. Le Floch JP, Baudin E, Escuyer P, Wirquin E, Nillus P, Perlemuter L. Influence of non-carbohydrate foods on glucose and insulin responses to carbohydrates of different glycaemic index in type 2 diabetic patients. Diab Medicine 1992; 9: 44-8.
165. Rahman M, Malik MA, Mubarak SA. Glycaemic index of Pakistani staple foods in mixed meals for diabetics. J Pak Med Assoc 1992: 42: 60-2.
166. Wolever TMS, Jenkins DJA, Kalmusky J, Jenkins A, Giordano C, Giudici S, Josse RG, Wong GS. Comparison of regular and parboiled rices: explanation of discrepancies between reported glycemic responses to rice. Nutr Res 1986, 6: 349-57.
167. Juliano BO, Perez CM, Komindr S, Banphotkasem S. Properties of Thai cooked rice and noodles differing in glycemic index in noninsulin-dependent diabetics. Plant Foods Hum Nutr 1989; 39: 369-74.
168. Larsen HN, Christensen C, Rasmussen OW, Tetens IH, Choudhury NH, Thilsted SH, Hermansen K. Influence of parboiling and physico-chemical characteristics of rice on the glycaemic index in non-insulin-dependent diabetic subjects. Euro J Clin Nutr 1996; 50: 22-7.
169. Larsen HN, Rasmussen OW, Rasmussen PH, Alstrup KK, Biswas SK, Tetens I, Thilsted SH, Hermansen K. Glycaemic index of parboiled rice depends on the severity of processing: study in type 2 diabetic subjects. Euro J Clin Nutr 2000; 54: 380-5.
170. Rasmussen O, Gregersen S, Hermansen K. Influence of the amount of starch on the glycaemic index to rice in non-insulin-dependent diabetic subjects. B J Nutr 1992; 67: 371-7.
171. Rasmussen OW, Gregersen S, Dorup J, Hermansen K. Blood glucose and insulin responses to different meals in non-insulin dependent diabetic subjects of both sexes. Am J Clin Nutr 1992; 56: 712-5.
172. Kavita MS, Prema L. Glycaemic response to selected cereal-based South Indian meals in non-insulin dependent diabetics. J Nutr Environ Med 1997, 7: 287-94.
173. Mani UV, Pradhan SN, Mehta NC, Thakur DM, Iyer U, Mani I. Glycaeimc index of conventional carbohydrate meals. B Jr Nutr 1992; 68: 445-50.
174. Gannon MC, Nuttall FQ, Krezowski PA, Billington CJ, Parker S. The serum insulin and plasma glucose responses to milk and fruit products in Type 2 (non-insulin-dependent) diabetic patients. Diabetologia 1986; 29: 784-91.
175. Bukar J, Mezitis NHE, Saitas V, Pi-Sunyer, FX. Frozen Desserts and Glycemic response in well-controlled NIDDM patients. Diab Care 1990; 13(4): 382-5.
176. Gregersen S, Rasmussen O, Larsen S, Hermansen K. Glycaemic and insulinaemic responses to orange and apple compared with white bread in non-insulin-dependent diabetic subjects. Euro J Clin Nutr 1992; 46: 301-3.
177. Ha M-A, Mann JI, Melton LD, Lewis-Barned NJ. Relationship between the glycaemic index and sugar content of fruits. Diab Nutr Metab 1992; 5: 199-203.
178. Lunetta M, Di Mauro M, Crimi S, Mughini L. No important differences in glycaemic responses to common fruits in type 2 diabetic patients. Diab Medicine 1995; 12(8): 674-8.
179. Wolever TMS, Vuksan V, Katzman Relle L, Jenkins AL, Josse RG, Wong GS, Jenkins DJA. Glycemic index of fruits and fruit products in patients with diabetes. Int J Food Sci Nutr 1993; 43: 205-12.
180. Ercan N, Nuttal FQ, Gannon MC, Lane JT, Burmeister LA, Westphal SA. Plasma glucose and insulin responses to bananas of varying ripeness in persons with noninsulin-dependent diabetes mellitus. J Am Coll Nutr 1993; 12: 703-9.
181. Hermansen K, Rasmussen O, Gregersen S, Larsen S. Influence of ripeness of banana on the blood glucose and insulin response in type 2 diabetic subjects. Diab Medicine 1992; 9: 739-43.
182. Guevarra MTB, Panlasigui LN. Blood glucose responses of diabetes mellitus type II patients to some local fruits. Asia Pacific J Clin Nutr 2000; 9(4): 303-8.
183. Wolever TMS, Jenkins DJA, Thompson LU, Wong GS, Josse RG. Effects of canning on the blood glucose response to beans in patients with type 2 diabetes. Hum Nutr Clin Nutr 1987; 41C: 135-40.
184. Vorster HH, van Tonder E, Kotzé JP, Walker ARP. Effects of graded sucrose additions on taste preference, acceptability, glycemic index, and insulin response to butter beans. Am J Clin Nutr 1987; 45:5 75-9.
185. Wolever TMS, Cohen Z, Thompson LU, Thorne MJ, Jenkins MJ, Prokipchuk EJ, Jenkins DJ. Ileal loss of available carbohydrate in man: comparison of a breath hydrogen method with direct measurement using a human ileostomy model. Am J Gastroenterol 1986; 81:115-22.
186. Indar-Brown K, Norenberg C, Madar Z. Glycemic and insulinemic responses after ingestion of ethnic foods by NIDDM and healthy subjects. Am J Clin Nutr 1992; 55: 89-95.
187. Frati-Munari AC, Roca-Vides RA, Lopez-Perez RJ, de Vivero I, Ruiz-Velazco M. The glycaemic index of some foods common in Mexico. Gac Med Mex 1991; 127: 163-70.
188. Wolever TM, Jenkins DJ, Kalmusky J, Giordano C, Giudici S, Jenkins AL, Thompson LU, Wong GS, Jose RG. Glycemic response to pasta: effect of surface area, degree of cooking, and protein enrichment. Diab Care 1986; 9(4): 401-4.
189. Lunetta M, Di Mauro M. Different effect of acute and chronic oral metformin administration on glucose and insulin response to bread and to pasta in non-insulin dependent diabetic patients. Diabetes Res Clin Pract 1996, 33: 53-8.
190. Rasmussen O, Winther E, Gregersen S, Hermansen K. Effects of processing, flour type and emulgator on the glycaemic response to spaghetti in non-insulin dependent diabetic subjects. Diab Nutr Metab 1992; 5: 107-12.
191. Rasmussen O, Winther E, Arnfred J, Hermansen K. Comparison of blood glucose and insulin responses in non-insulin-dependent diabetic patients. Studies with spaghetti and potato taken alone or as part of a meal. Eur J Clin Nutr 1988; 42: 953-61.
192. Parillo M, Giacco R, Riccardi G, Pacioni D, Rivellese A. Different glycaemic responses to pasta, bread, and potatoes in diabetic patients. Diabet Med 1985, 2: 374-7.
193. Vuksan V, Jenkins DJA, Josse RG, Jenkins A. Effect of varying meal fat and carbohydrate content on the glycemic index of spaghetti in patients with NIDDM. Diabetes 1990; 39 (Suppl 1): 47A.
194. Siddhu A, Sud S, Bijlani RL, Karmarkar MG, Nayar U. Modulation of postprandial glycaemia and insulinaemia by cellulose in mixed nutrient combinations. B J Nutr 1989; 62(1): 131-7.
195. Ionescu-Tîrgoviste C, Popa E, Sîntu E, Mihalache N, Cheta D, Mincu I. Blood glucose and plasma insulin responses to various carbohydrates in Type 2 (Non-insulin-dependent) diabetes. Diabetologia 1983; 24: 80-4.
196. Natah SS, Hussien KR, Tuominem JA, Koivisto VA. Metabolic response to lactitol and xylitol in healthy men. Am J Clin Nutr 1997; 65: 947-50.
197. Rizkalla SW, Luo J, Wils D, Bruzzo F, Slama G. Glycaemic and insulinaemic responses to a new hydrogenated starch hydrolysate in healthy and type 2 diabetic subjects. Diabetes Metab (Paris), 2002, 28: 385-390.
198. Wolever TMS, Kalmusky J, Guidici S, et al. Effect of processing/preparation on the blood glucose response to potatoes. Can Inst Food Sci Technol J 1985; 18:35-6.
199. Najjar N, Adra N, Hwalla N. Glycemic and insulinemic responses to hot vs cooled potato in males with varied insulin sensitivity. Nutr Res 2004; 24: 993-1004.
200. Vijayan L, Sumathi S. Glycaemic response to selected Kerala breakfast items in people with diabetes. Asia Pacific J Clin Nutr 1997; 6(2): 80-3.
201. Quaye IKE, Brakohiapa LA, Amoah GAB, Ayi-Ankrah N, Kido Y. Acute effects of five Ghanaian carbohydrate diets on serum glucose, triglyceride and insulin in NIDDM. Asia Pacific J Clin Nutr 1999; 8(1): 32-5.
202. Mani UV, Prabhu BM, Damle SS, Mani I. Glycaemic index of some commonly consumed foods in western India. Asia Pacific J Clin Nutr 1993; 2: 111-4.
203. Pathak P, Srivastava S, Grover S. Development of foods products based on millets, legumes and fenugreek seeds and their suitability in the diabetic diet. Int J Food Sci Nutr 2000; 51: 409-14.
204. Feldman N, Norenberg C, Voet H, Manor E, Berner Y, Madar Z. Enrichment of an Israeli ethnic food with fibres and their effects on the glycaemic and insulinaemic responses in subjects with non-insulin-dependent diabetes mellitus. Br J Nutr 1995; 74: 681-8.
205. Bacardi-Gascon M, Duenas-Mena D, Jimenez-Cruz A. Lowering effect on postprandial glycemic response of nopales added to Mexican breakfasts. Diab Care 2007, 30: 1264-5.
